# Supplementary material
Source: Springer Nature journal article supplement (https://www.springermedizin.de/resource/supplementary/12885_2011_2914_MOESM14_ESM.pdf/9462328)

**A**

CT36 CT51 CT26

Nck1

Nck2

Actin

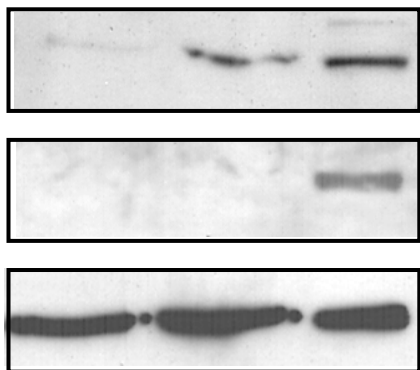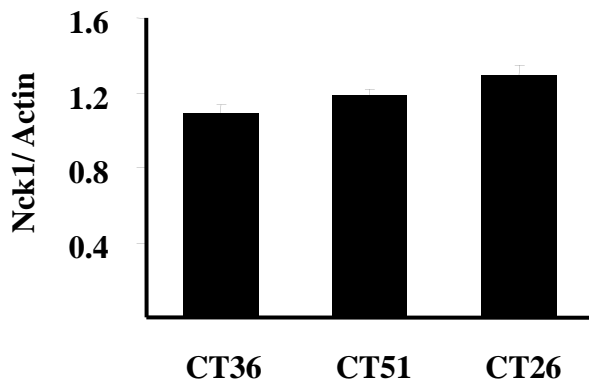**B**

MCF-10A

MCF 7

T47D

MDA-MB-231

Nck1

Nck2

Actin

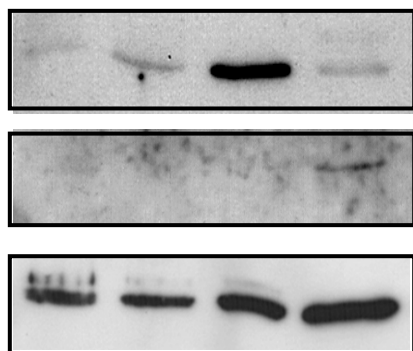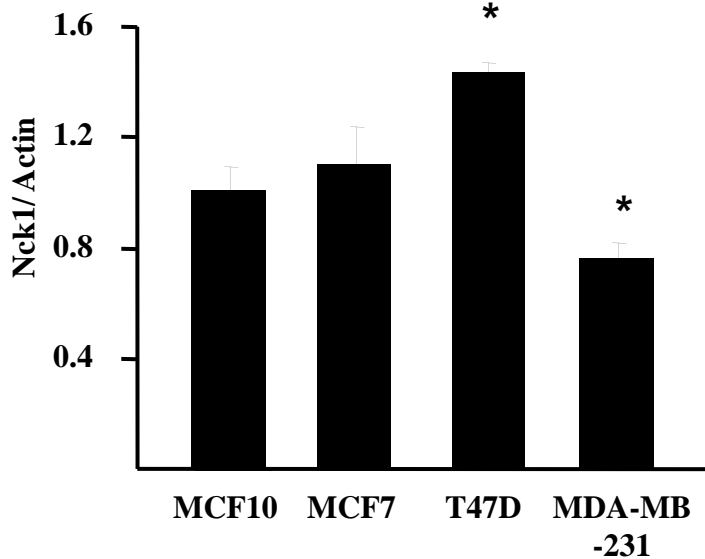

Supplement: MOESM14 [file 9462328]
